# Supplementary material
Source: Research Square preprint supplement (doi:10.21203/rs.3.rs-9476499/v1)
Supplement: Supplementary file 1 [file 46e6cb35c3c2cdb0e2444059.docx]

Supplementary material

**Isolation of the New Cytotoxic Polyketide (−)-*R*-Talaropinophiloic Acid Guided by an Integrated Metabolomics-Dereplication Approach**

Marcus Vinicius Almeida Marques,a Andresa Hiromi Sakai,b Lucas Haidar Martorano,c Viviani N. Takahashi,d Juliana Mara Serpeloni,b Fernando Martins dos Santos Júnior,c Jorge M. David,a and Eliane O. Silvaa,*

*a Department of Organic Chemistry, Institute of Chemistry, Universidade Federal da Bahia, Salvador 40170-115, Bahia, Brazil*

*b Department of General Biology, Center for Biological Sciences, Universidade Estadual de Londrina, Londrina 86057-970, Paraná, Brazil*

*c Departamento of Organic Chemistry, Chemistry Institute, Federal Fluminense*

*University – UFF, Niterói 24.020-141, Rio de Janeiro, Brazil*

*d Department of Chemistry, Faculty of Philosophy, Sciences and Letters of Ribeirão Preto, Universidade de São Paulo, Ribeirão Preto 14040900, São Paulo, Brazil*

*Corresponding author:

elianeos@ufba.br (E.O. Silva)

Institute of Chemistry, Organic Chemistry Department, Federal University of Bahia (UFBA), Barão de Jeremoabo 147, 40170-115 Salvador, Bahia, Brazil

A

B

C

D

E

F

**Fig. S1** Base peak chromatogram (100–1000 Da) from the extract of J1, J5, J6, J7, J9, and J13 strains (A-F, respectively) growth in PDA medium. Data acquired at electrospray ionization in positive mode.

**
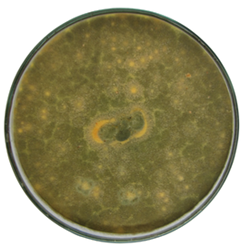
**

**Fig. S2** Macroscopic morphology of 7-day culture of Talaromyces pinophilus J6 grown on potato dextrose agar

**Table S1.** Complete list of features exclusively detected in Talaromyces pinophilus J6 grown on PDA_AS. The seven annotated natural products (**a**-**g**), due to their lower mass error, common adducts for positive ionization mode (under the employed analytical method), and a match score with compounds from our in-house library greater than 0.5, are gray-highlighted. The isolated compounds are green-highlighted.

| **row identity**  data bank ID:adduct:score | **m/z** | **retention time** | **J6_PDA** Feature status | **J6_PDA_ST** Feature status | **J6_PDA_AS** Feature status | **J6_PDA_AS** Peak area |
| --- | --- | --- | --- | --- | --- | --- |
| 864: [M+NH4]+: 0.617 | 136.06235 | 6.2624 | UNKNOWN | UNKNOWN | DETECTED | 2137533.5 |
| 711: [M+NH4]+: 0.812 | 215.10357 | 12.398 | UNKNOWN | UNKNOWN | DETECTED | 2579876.5 |
| 697: [M+NH4]+: 0.861 | 126.05565 | 12.702 | UNKNOWN | UNKNOWN | DETECTED | 5250707.5 |
| 646: [M+H]+: 0.867 | 152.07127 | 12.702 | UNKNOWN | UNKNOWN | DETECTED | 3569922.5 |
| 645: [M+H]+: 0.697 | 190.04835 | 12.702 | UNKNOWN | UNKNOWN | DETECTED | 7203956.5 |
| 820: [M+H]+: 0.445 | 239.06749 | 14.508 | UNKNOWN | UNKNOWN | DETECTED | 3510277.5 |
| 120: [M+NH4]+: 0.762 | 216.12422 | 15.554 | UNKNOWN | UNKNOWN | DETECTED | 3348312.8 |
| 705: [M+NH4]+: 0.787 | 190.10849 | 15.639 | UNKNOWN | UNKNOWN | DETECTED | 4433511.5 |
| 880: [M+NH4]+: 0.761 | 224.09293 | 15.767 | UNKNOWN | UNKNOWN | DETECTED | 875192.2 |
| 756: [M+H]+: 0.813 | 157.05051 | 16.018 | UNKNOWN | UNKNOWN | DETECTED | 4531233.5 |
| 208: [M+H]+: 0.706 | 169.04807 | 16.560 | UNKNOWN | UNKNOWN | DETECTED | 8055467 |
| 166: [M+NH4]+: 0.668 | 318.09888 | 16.812 | UNKNOWN | UNKNOWN | DETECTED | 1825431 |
| 576: [M+NH4]+: 0.746 | 241.15593 | 17.149 | UNKNOWN | UNKNOWN | DETECTED | 1013323.3 |
| 849: [M+H]+: 0.762 | 193.05077 | 18.134 | UNKNOWN | UNKNOWN | DETECTED | 6705788.5 |
| 847: [M+H]+: 0.770 | 207.02763 | 18.134 | UNKNOWN | UNKNOWN | DETECTED | 5029270 |
| 669: [M+K]+: 0.447 | 265.11728 | 18.497 | UNKNOWN | UNKNOWN | DETECTED | 4950071 |
| 109: [M+H]+: 0.809 | 181.05053 | 18.537 | UNKNOWN | UNKNOWN | DETECTED | 18381566 |
| 278: [M+NH4]+: 0.729 | 388.14107 | 18.697 | UNKNOWN | UNKNOWN | DETECTED | 1210966.5 |
| **a** 675: [M+Na]+: 0.776 | 205.0460 | 18.737 | UNKNOWN | UNKNOWN | DETECTED | 1801531.1 |
| 874: [M+NH4]+: 0.750 | 204.12428 | 18.777 | UNKNOWN | UNKNOWN | DETECTED | 6991657.5 |
| 749: [M+H]+: 0.738 | 246.0774 | 18.897 | UNKNOWN | UNKNOWN | DETECTED | 34431060 |
| 723: [M+H]+: 0.782 | 239.09029 | 18.937 | UNKNOWN | UNKNOWN | DETECTED | 3620280.2 |
| 750: [M+H]+: 0.755 | 202.08503 | 18.976 | UNKNOWN | UNKNOWN | DETECTED | 2186877.8 |
| 117: [M+H]+: 0.806 | 211.06107 | 18.976 | UNKNOWN | UNKNOWN | DETECTED | 6133644 |
| 428: [M+H]+: 0.669 | 321.09853 | 18.976 | UNKNOWN | UNKNOWN | DETECTED | 3847950.5 |
| 714: [M+H]+: 0.878 | 343.08062 | 18.976 | UNKNOWN | UNKNOWN | DETECTED | 1507671.5 |
| 798: [M+NH4]+: 0.676 | 302.10394 | 19.055 | UNKNOWN | UNKNOWN | DETECTED | 5636771.5 |
| 763: [M+K]+: 0.939 | 277.11974 | 19.214 | UNKNOWN | UNKNOWN | DETECTED | 6906535 |
| 824: [M+NH4]+: 0.880 | 354.09661 | 19.214 | UNKNOWN | UNKNOWN | DETECTED | 8593076 |
| 722: [M+H]+: 0.757 | 211.09526 | 19.373 | UNKNOWN | UNKNOWN | DETECTED | 15109078 |
| 839: [M+Na]+: 0.668 | 329.06488 | 19.574 | UNKNOWN | UNKNOWN | DETECTED | 1238988.4 |
| 3: [M+K]+: 0.858 | 432.16765 | 19.967 | UNKNOWN | UNKNOWN | DETECTED | 5636684.5 |
| 826: [M+H]+: 0.865 | 341.0649 | 20.006 | UNKNOWN | UNKNOWN | DETECTED | 1491232.8 |
| 244: [M+NH4]+: 0.559 | 400.14133 | 20.006 | UNKNOWN | UNKNOWN | DETECTED | 3326324.5 |
| 827: [M+H]+: 0.909 | 369.09642 | 20.564 | UNKNOWN | UNKNOWN | DETECTED | 7441919.5 |
| 279: [M+NH4]+: 0.712 | 374.12535 | 20.564 | UNKNOWN | UNKNOWN | DETECTED | 10174723 |
| 529: [M+H]+: 0.753 | 195.10033 | 20.603 | UNKNOWN | UNKNOWN | DETECTED | 9675234 |
| 139: [M+H]+: 0.767 | 265.10824 | 20.603 | UNKNOWN | UNKNOWN | DETECTED | 2201312.5 |
| 91: [M+H]+: 0.819 | 251.0923 | 20.683 | UNKNOWN | UNKNOWN | DETECTED | 2133682.2 |
| 798: [M+NH4]+: 0.676 | 302.10394 | 19.055 | UNKNOWN | UNKNOWN | DETECTED | 5636771.5 |
| 302: [M+NH4]+: 0.778 | 266.13757 | 20.683 | UNKNOWN | UNKNOWN | DETECTED | 1390973.5 |
| **b** 90: [M+H]+: 0.756 | 237.07699 | 20.722 | UNKNOWN | UNKNOWN | DETECTED | 1985499.2 |
| 265: [M+NH4]+: 0.648 | 360.14593 | 20.762 | UNKNOWN | UNKNOWN | DETECTED | 6682047 |
| 156: [M+H]+: 0.620 | 389.16137 | 20.762 | UNKNOWN | UNKNOWN | DETECTED | 1221826 |
| 880: [M+H]+: 0.769 | 207.06634 | 20.842 | UNKNOWN | UNKNOWN | DETECTED | 2982268.2 |
| 185: [M+H]+: 0.918 | 429.15397 | 20.842 | UNKNOWN | UNKNOWN | DETECTED | 2888913 |
| 647: [M+H]+: 0.695 | 195.06671 | 20.961 | UNKNOWN | UNKNOWN | DETECTED | 1848509 |
| 592: [M+K]+: 0.863 | 391.15964 | 21.435 | UNKNOWN | UNKNOWN | DETECTED | 2148652.2 |
| 575: [M+H]+: 0.791 | 183.09993 | 21.474 | UNKNOWN | UNKNOWN | DETECTED | 774721.6 |
| 774: [M+NH4]+: 0.657 | 390.15644 | 21.474 | UNKNOWN | UNKNOWN | DETECTED | 9727725 |
| **c** 114: [M+H]+: 0.717 | 363.10889 | 21.513 | UNKNOWN | UNKNOWN | DETECTED | 6734015 |
| 549: [M+H]+: 0.869 | 385.09112 | 21.513 | UNKNOWN | UNKNOWN | DETECTED | 6783180 |
| 771: [M+NH4]+: 0.871 | 192.06617 | 21.709 | UNKNOWN | UNKNOWN | DETECTED | 5632537.5 |
| 870: [M+K]+: 0.883 | 390.14598 | 21.709 | UNKNOWN | UNKNOWN | DETECTED | 27118170 |
| 207: [M+H]+: 0.742 | 291.0876 | 21.749 | UNKNOWN | UNKNOWN | DETECTED | 1698877 |
| 297: [M+H]+: 0.711 | 317.06702 | 21.749 | UNKNOWN | UNKNOWN | DETECTED | 7723254.5 |
| 611: [M+NH4]+: 0.692 | 332.1144 | 21.866 | UNKNOWN | UNKNOWN | DETECTED | 4373645 |
| 154: [M+H]+: 0.701 | 403.14027 | 21.866 | UNKNOWN | UNKNOWN | DETECTED | 3469163 |
| 198: [M+H]+: 0.845 | 155.10745 | 21.943 | UNKNOWN | UNKNOWN | DETECTED | 6951705.5 |
| **d** 136: [M+H]+: 0.637 | 419.13549 | 22.021 | UNKNOWN | UNKNOWN | DETECTED | 3001251.2 |
| **e** 368: [M+H]+: 0.785 | 267.1216 | 22.138 | UNKNOWN | UNKNOWN | DETECTED | 3553592.5 |
| 323: [M+Na]+: 0.155 | 405.15624 | 22.295 | UNKNOWN | UNKNOWN | DETECTED | 2666925 |
| 734: [M+H]+: 0.790 | 185.04553 | 22.373 | UNKNOWN | UNKNOWN | DETECTED | 1501829.2 |
| 351: [M+H]+: 0.762 | 249.07697 | 22.373 | UNKNOWN | UNKNOWN | DETECTED | 21168118 |
| 15: [M+K]+: 0.730 | 349.09351 | 22.373 | UNKNOWN | UNKNOWN | DETECTED | 34388988 |
| 214: [M+H]+: 0.737 | 223.09516 | 22.491 | UNKNOWN | UNKNOWN | DETECTED | 7368954 |
| 416: [M+Na]+: 0.609 | 443.1332 | 22.610 | UNKNOWN | UNKNOWN | DETECTED | 707472.1 |
| 387: [M+H]+: 0.783 | 283.11649 | 22.887 | UNKNOWN | UNKNOWN | DETECTED | 4211945 |
| **f** 133: [M+H]+: 0.666 | 375.10914 | 22.887 | UNKNOWN | UNKNOWN | DETECTED | 14816281 |
| 146: [M+]+: 0.753 | 397.09124 | 22.887 | UNKNOWN | UNKNOWN | DETECTED | 9575312 |
| 162: [M+H]+: 0.266 | 825.16985 | 23.043 | UNKNOWN | UNKNOWN | DETECTED | 26036162 |
| 111: [2M+H]+: 0.434 | 657.19951 | 23.082 | UNKNOWN | UNKNOWN | DETECTED | 1300383.2 |
| 903: [M+K]+: 0.403 | 404.14397 | 23.278 | UNKNOWN | UNKNOWN | DETECTED | 1516457.9 |
| 413: [M+H]+: 0.997 | 401.12306 | 23.437 | UNKNOWN | UNKNOWN | DETECTED | 1654892.6 |
| 253: [M+H]+: 0.926 | 413.15911 | 23.558 | UNKNOWN | UNKNOWN | DETECTED | 5950916.5 |
| 119: [M+H]+: 0.784 | 183.10266 | 23.761 | UNKNOWN | UNKNOWN | DETECTED | 2755833.8 |
| 418: [M+H]+: 0.782 | 417.11909 | 23.964 | UNKNOWN | UNKNOWN | DETECTED | 1339851.9 |
| 415: [M+Na]+: 0.782 | 427.10104 | 24.044 | UNKNOWN | UNKNOWN | DETECTED | 723205.5 |
| 209: [M+H]+: 0.863 | 109.06547 | 24.163 | UNKNOWN | UNKNOWN | DETECTED | 2451827.2 |
| 276: [M+H]+: 0.589 | 389.17277 | 24.163 | UNKNOWN | UNKNOWN | DETECTED | 3321278.2 |
| 164: [2M+NH4]+: 0.418 | 590.13222 | 24.403 | UNKNOWN | UNKNOWN | DETECTED | 2763903 |
| 375: [M+H]+: 0.404 | 239.0580 | 24.442 | UNKNOWN | UNKNOWN | DETECTED | 6511078 |
| **2** 411: [M+Na]+: 0.732 | 411.10538 | 24.442 | UNKNOWN | UNKNOWN | DETECTED | 836990140 |
| **1** 113: [M+Na]+: 0.726 | 379.07885 | 24.482 | UNKNOWN | UNKNOWN | DETECTED | 1064326.5 |
| 770: [M+H]+: 0.345 | 401.08998 | 24.521 | UNKNOWN | UNKNOWN | DETECTED | 8832310 |
| 219: [M+H]+: 0.805 | 197.04545 | 24.600 | UNKNOWN | UNKNOWN | DETECTED | 3958610.5 |
| 181: [M+Na]+: 0.963 | 375.0841 | 24.600 | UNKNOWN | UNKNOWN | DETECTED | 3517727.5 |
| **g** 135: [M+H]+: 0.091 | 211.0610 | 24.679 | UNKNOWN | UNKNOWN | DETECTED | 2687240.2 |
| 129: [M+Na]+: 0.315 | 187.07637 | 25.608 | UNKNOWN | UNKNOWN | DETECTED | 1672651.9 |
| 137: [M]+: 0.906 | 190.06347 | 25.608 | UNKNOWN | UNKNOWN | DETECTED | 2710075 |
| 772: [M+H]+: 0.772 | 233.08201 | 25.608 | UNKNOWN | UNKNOWN | DETECTED | 30356360 |
| 400: [M+Na]+: 0.558 | 407.11233 | 26.057 | UNKNOWN | UNKNOWN | DETECTED | 3658270.2 |
| 420: [M+Na]+: 0.606 | 409.12779 | 26.841 | UNKNOWN | UNKNOWN | DETECTED | 2167998.5 |
| 623: [M+Na]+: 0.643 | 413.26801 | 33.942 | UNKNOWN | UNKNOWN | DETECTED | 4542658.5 |
| 625: [M+H]+: 0.749 | 285.24367 | 34.835 | UNKNOWN | UNKNOWN | DETECTED | 1644876.1 |

**Fig. S3** 500 MHz 1H NMR spectrum of (-)-*R*-talaropinophiloic acid (**1**) registered in CD3OD


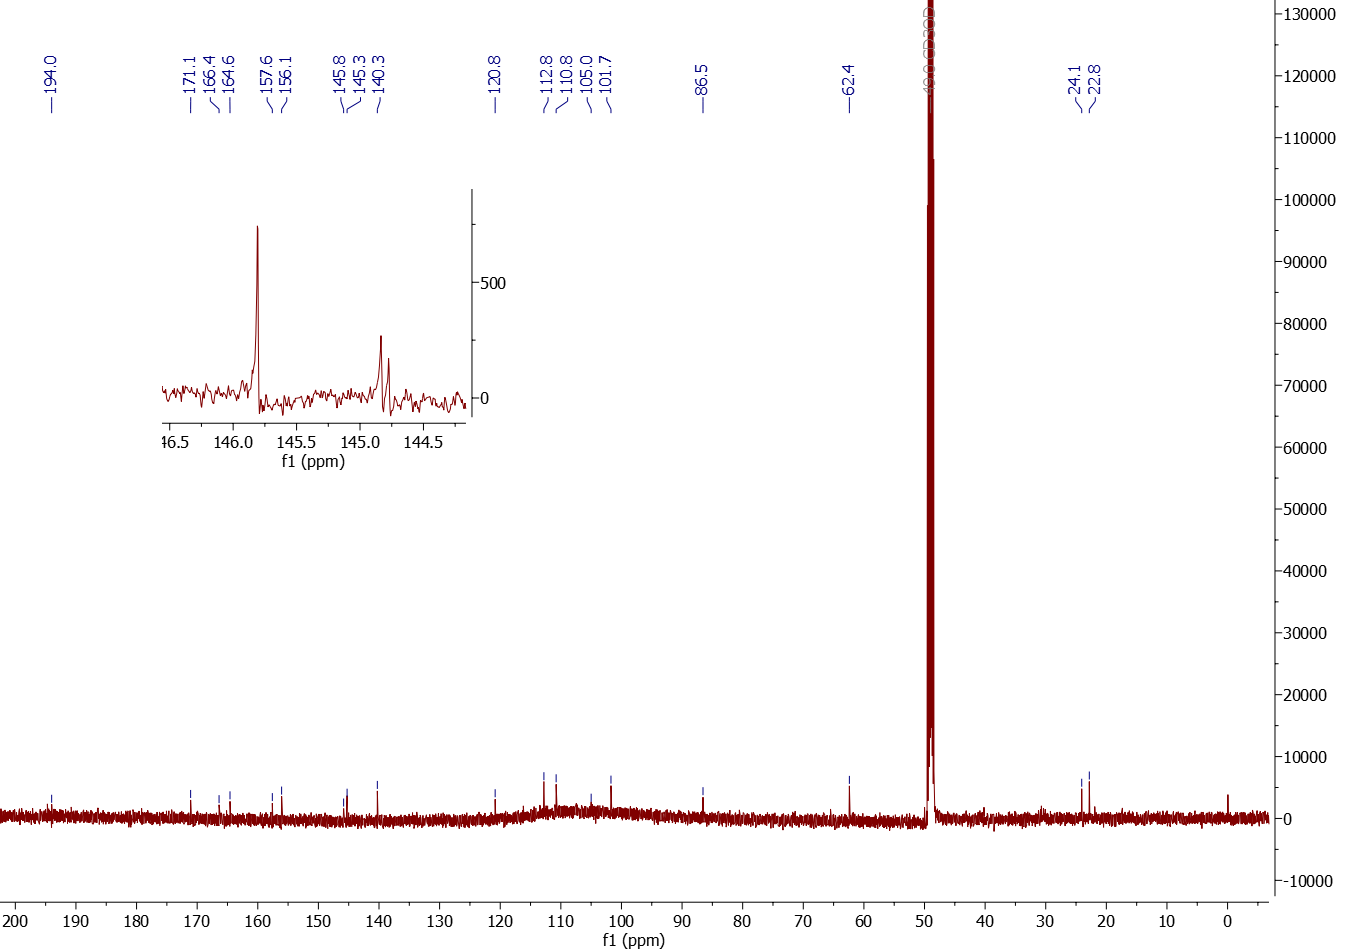


**Fig. S4** 125 MHz 13C spectrum of (-)-*R*-talaropinophiloic acid (**1**) registered in CD3OD

**Fig. S5** Heteronuclear HSQC (500 MHz for 1H; 125 MHz for 13C) contour map of (-)-*R*-talaropinophiloic acid (**1**) registered in CD3OD


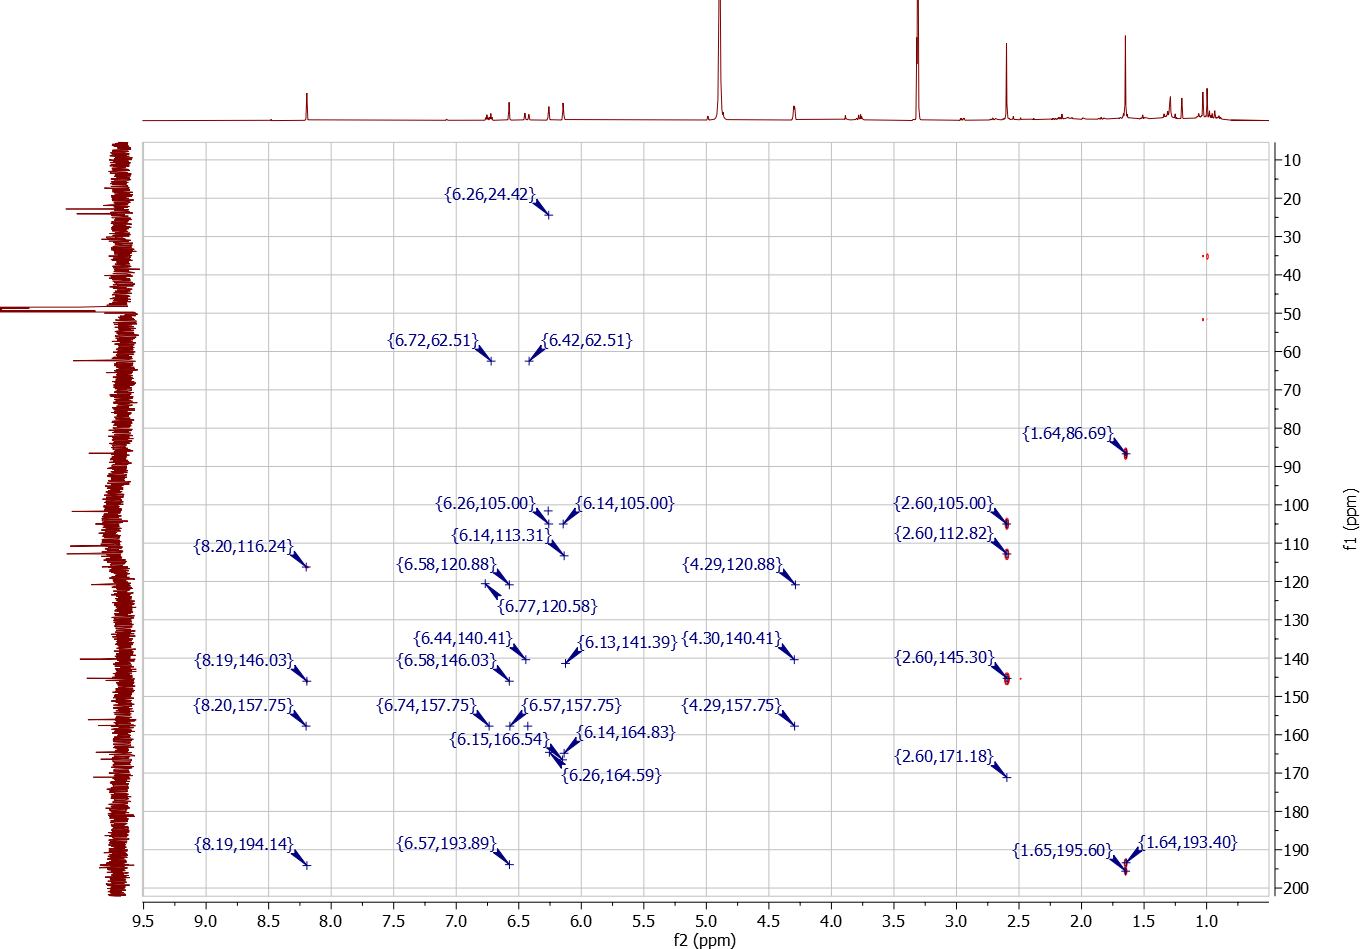


**Fig. S6** Heteronuclear HMBC (500 MHz for 1H; 125 MHz for 13C) contour map of (-)-*R*-talaropinophiloic acid (**1**) registered in CD3OD


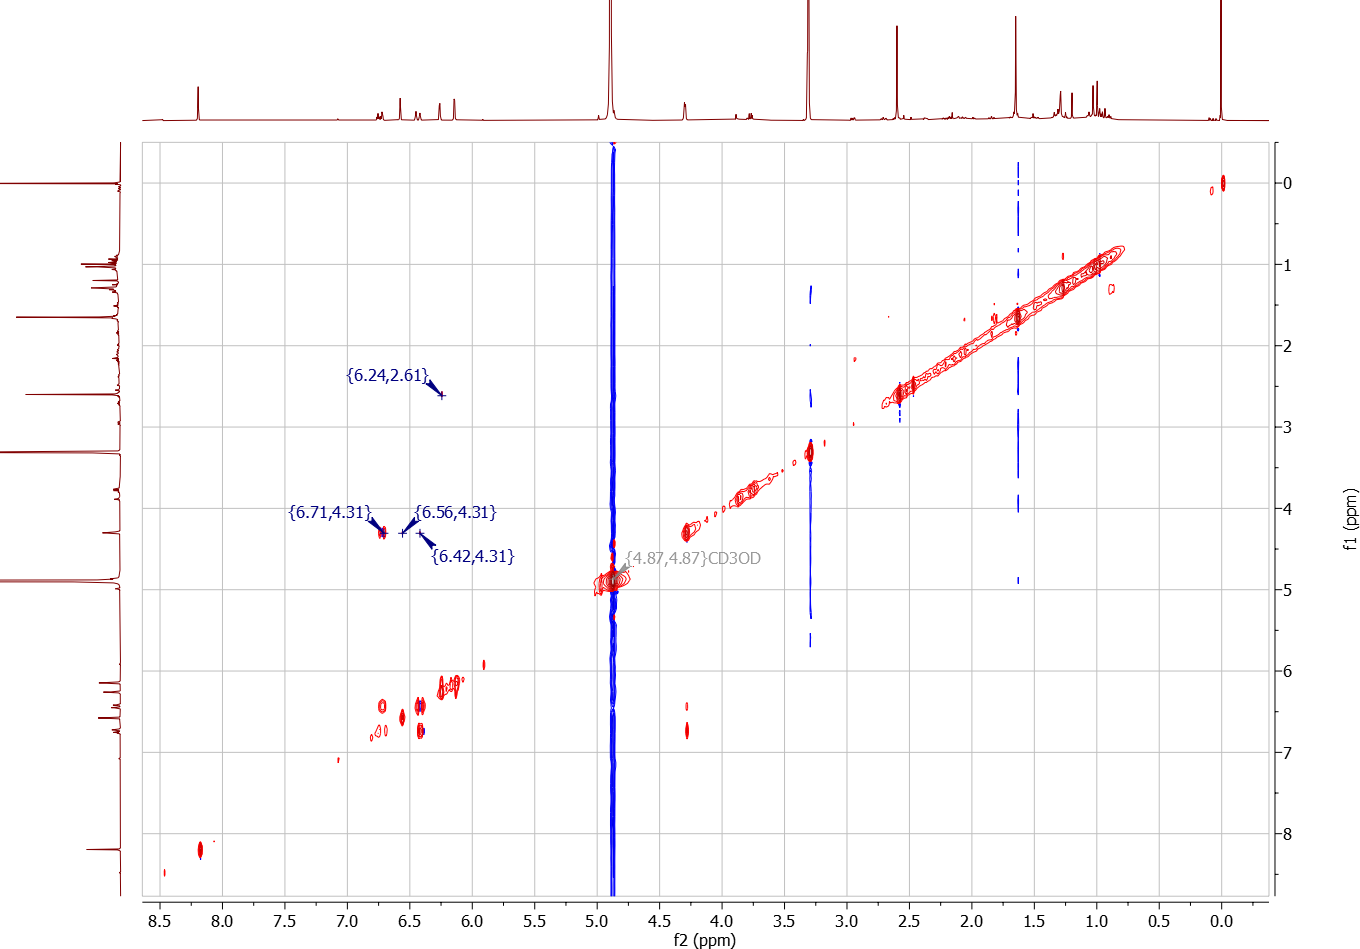


**Fig. S7** Homonuclear TOCSY (500 MHz) contour map of (-)-*R*-talaropinophiloic acid (**1**) registered in CD3OD

**Fig. S8** HRESIMS spectrum of (-)-*R*-talaropinophiloic acid (**1**) (positive ion mode)

**Fig. S9** 500 MHz 1H NMR spectrum of 3-*O*-methylfunicone registered in CD3OD

**Fig. S10** 125 MHz 13C spectrum of 3-*O*-methylfunicone registered in CD3OD

**Fig. S11** Heteronuclear HSQC (500 MHz for 1H; 125 MHz for 13C) contour map of 3-*O*-methylfunicone registered in CD3OD

**Fig. S12** Heteronuclear HMBC (500 MHz for 1H; 125 MHz for 13C) contour map of 3-*O*-methylfunicone registered in CD3OD

**Fig. S13** HRESIMS spectrum of 3-*O*-methylfunicone (positive ion mode)
